# Supplementary material for: Oncogenic miR-20b-5p contributes to malignant behaviors of breast cancer stem cells by bidirectionally regulating CCND1 and E2F1
Source: Springer Nature journal article supplement (doi:10.1186/s12885-020-07395-y), 2020-10-02
Supplement: MOESM1 [file 18442266]

CCND1-WT

NM\_053056-3utr(mir-20b)-3

TTT TAGGTAGAAAACATATTCTTGTGCTTTTCCTGATAAAGCACAGCTGTAGTGGGGTTCTAGGCA  
TCTCTGTACTTTGCTTGCTCATATGCATGTAGTCACTTTATAAGTCATTGTATGTTATTATATTCCGTAG  
GTAGATGTGTAACCTCTTCACCTTATTCATGGCTGAAGTCACCTCTTGGTTACAGTAGCGTAGCGTG  
CCTTTTCTACCCAACGGCCCTGCAGCCAGCTCACGTCCAGGTTCAACCCACAGCTACTTGGTTTGT  
GTTCTTCTTCATATTCTAAAACCATTCATTCCAAGCACTTTCAGTCCAATAGGTGTAGGAAATAGC  
GCTGTTTTTGTGTTGTGTGTGCAGGGAGGGCAGTTTTCTAATGGAATGGTTTGGGAATATCCATGTACT  
TGTTTGCA

CCND1-MT

NM\_053056-3utr(mir-20b)-3mu

TTT TAGGTAGAAAACATATTCTTGTGCTTTTCCTGATAAAGCACAGCTGTAGTGGGGTTCTA  
GGCATCTCTGTACTTTGCTTGCTCATATGCATGTAGTATAAGTCATTGTATGTTATTATATTCCGT  
AGGTAGATGTGTAACCTCTTCACCTTATTCATGGCTGAAGTCACCTCTTGGTTACAGTAGCGT  
AGCGTGCCTTTTCTACCCAACGGCCCTGCAGCCAGCTCACGTCCAGGTTCAACCCACAGCTA  
CTTGGTTTGTGTTCTTCTTCATATTCTAAAACCATTCATTCCAACAGTCCAATAGGTGTAGG  
AAATAGCGCTGTTTTTGTGTTGTGTGTGCAGGGAGGGCAGTTTTCTAATGGAATGGTTTGGGAAT  
ATCCATGTACTTGTTTGCA

E2F1-WT

NM\_005225-3utr(mir-20b)-3

GAAGGTGAACATACACCTCTGTGTGTGCACTGCAGACACGCCCCAGTGTGTCCACATGTGTG  
TGCATGAGTCCATGTGTGCGCGTGGGGGGGCTCTAACTGCACTTTCGGCCCTTTTGCTCTGGG  
GGTCCCACAAGGCCAGGGCAGTGCCTGCTCCCAGAATCTGGTGCTCTGACCAGGCCAGGTG  
GGGAGGCTTTGGCTGGCTGGAGGAGGGGTGGTGAAGGCCTCCCCCAGCCCAGACCCTGTGG  
TCCCTCCTGCAGTGTCTGAAGCGCCTGCCTCCCCACTGCTCTGCCCCACCCTCCAATCTGCAC  
TTTGATTTGCTTCCTAACAGCTCTGTTCCCTCCTGCTTTGGTTTTAATAAATATTTTGATGACGT  
TTGGGCCGGGTTTTGGGACTCTGTTGGGAACATTTTCGG

E2F1-MT

NM\_005225-3utr(mir-20b)-3mu

GAAGGTGAACATACACCTCTGTGTGTGCACTGCAGACACGCCCCAGTGTGTCCACATGTGTGTG  
CATGAGTCCATGTGTGCGCGTGGGGGGGCTCTAACTCGGCCCTTTTGCTCTGGGGGTCCCACAAG  
GCCCAGGGCAGTGCCTGCTCCCAGAATCTGGTGCTCTGACCAGGCCAGGTGGGGAGGCTTTGGC  
TGGCTGGAGGAGGGGTGGTGAAGGCCTCCCCCAGCCCAGACCCTGTGGTCCCTCCTGCAGTGTC  
TGAAGCGCCTGCCTCCCCACTGCTCTGCCCCACCCTCCAATCTGATTTGCTTCCTAACAGCTCTGT  
TCCCTCCTGCTTTGGTTTTAATAAATATTTTGATGACGTTTGGGCCGGGTTTTGGGACTCTGTTGG  
GAACATTTCGG

Supplementary figure 1: A: The sequences of CCND1(19068-1) CCND1 NM\_053056-3utr(mir-20b)-3mu GV306 and CCND1(24297-2) CCND1 NM\_053056-3utr(mir-20b)-3 GV306; B: The sequences of E2F1(19067-1) E2F1 NM\_005225-3utr(mir-20b)-3mu GV306 and E2F1(19070-2) E2F1 NM\_005225-3utr(mir-20b)-3 GV306



Supplementary figure 2: The predicted binding site and binding free energy between miR-20b-5p and the targets CCND1 (A) and E2F1 (B).

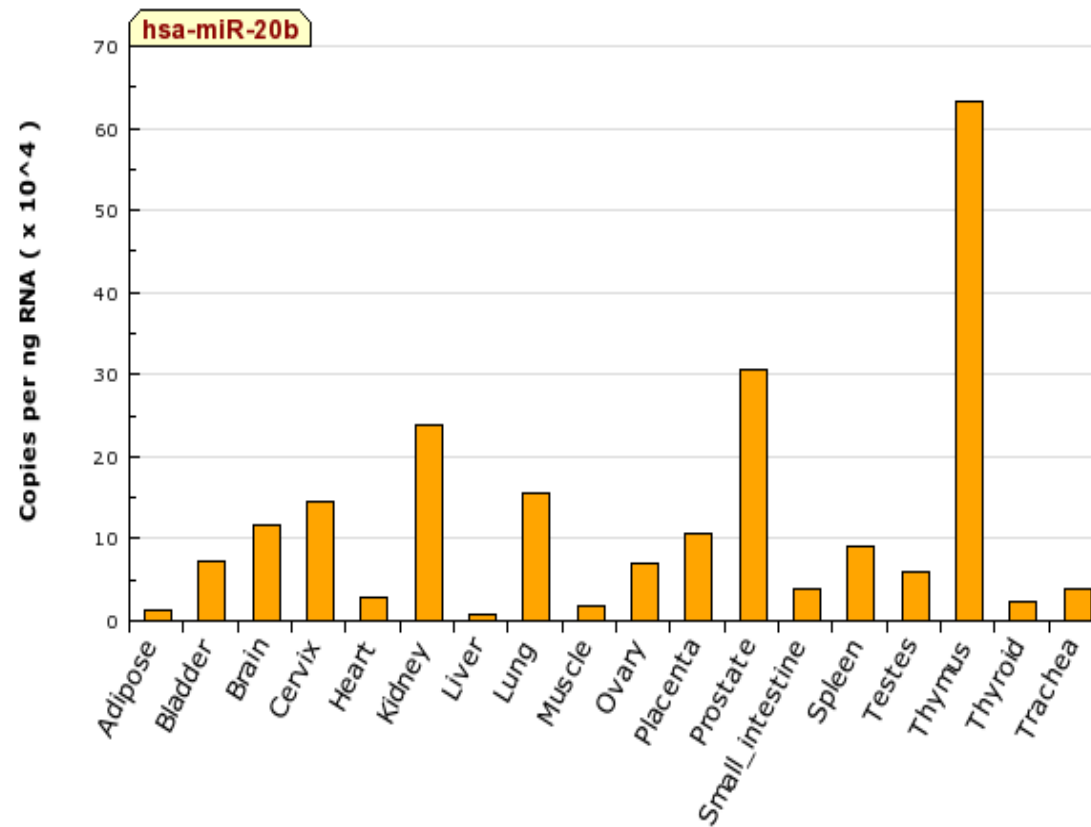

**Supplementary figure 3: The expression of miR-20b in normal tissues.**



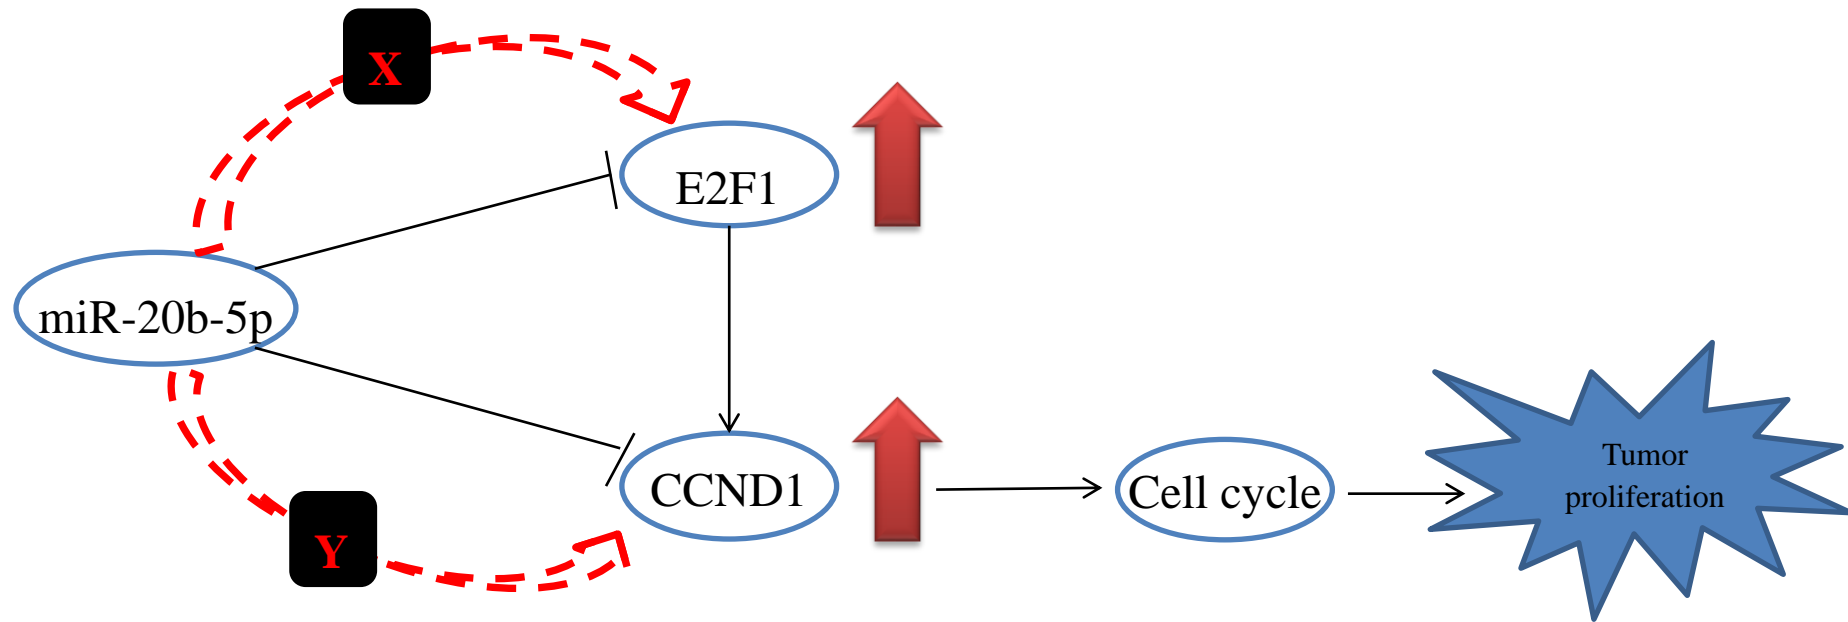

**Supplementary figure 4: The putative regulatory mechanism between miR-20b-5p and two target genes CCND1 and E2F1, X is the intermediate molecule of E2F1 indirectly regulated by miR-20b-5p, Y is the intermediate molecule of CCND1 indirectly regulated by miR-20b-5p.**

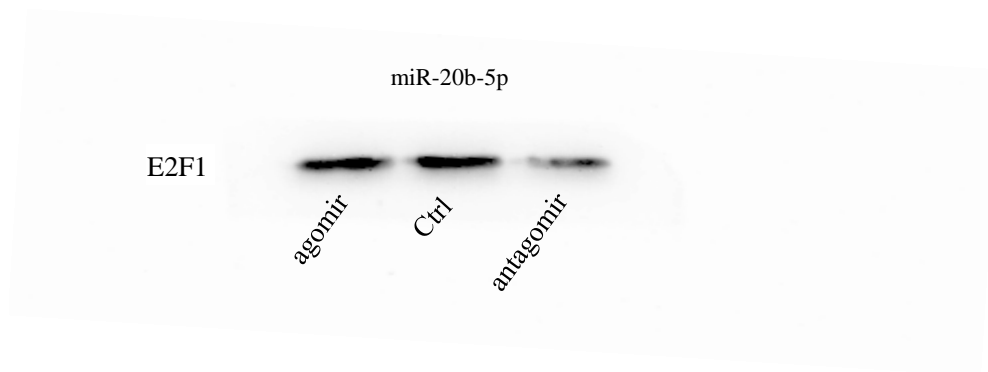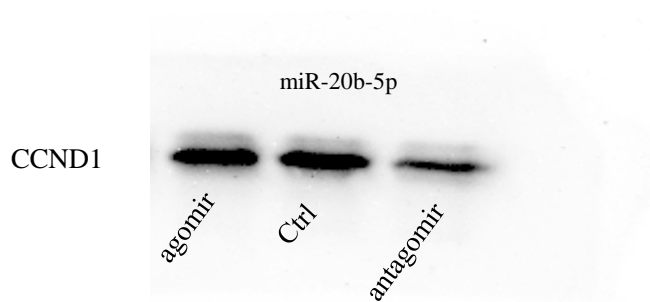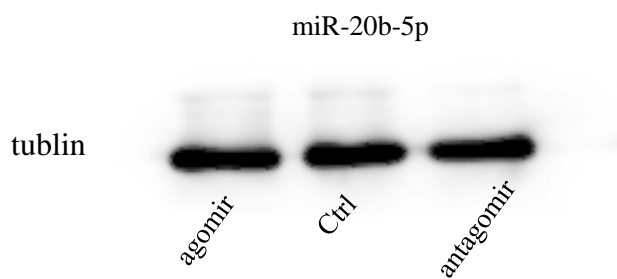

**Supplementary figure 5:** Uncropped full-length gels and western blot assay.
